# Supplementary material
Source: PubMed Central journal article supplement (PMC3416034)
Supplement: supp_11-1496_Online_Supplement.pdf [file supp_11-1496_Online_Supplement.pdf]

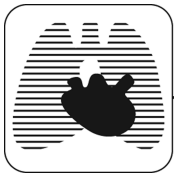

### Decision Support Tool for Early Differential Diagnosis of Acute Lung Injury and Cardiogenic Pulmonary Edema in Medical Critically Ill Patients

*Christopher N. Schmickl; Khurram Shahjehan, MD; Guangxi Li, MD; Rajanigandha Dhokarh, MD; Rahul Kashyap, MD; Christopher Janish; Anas Alsara, MD; Allan S. Jaffe, MD; Rolf D. Hubmayr, MD; and Ognjen Gajic, MD*

#### **e-Appendix 1. Definitions for data collection of predictor variables**

| Predictor Variable                                               | Definition                                                                                                                                | Coding                 |
|------------------------------------------------------------------|-------------------------------------------------------------------------------------------------------------------------------------------|------------------------|
| <b>General Information</b>                                       |                                                                                                                                           |                        |
| <b>Age (at T0)</b>                                               | Calculated as difference between date of birth and time of ALI sniffer alert                                                              | value                  |
| <b>Gender</b>                                                    | As documented in EMR                                                                                                                      | 0 = male<br>1 = female |
| <b>Body Mass Index (at T0)</b>                                   | Calculated from weight and height available in the EMR closest to time of ALI sniffer alert                                               | value                  |
| <b>Risk Factors for Cardiogenic Pulmonary Edema</b>              |                                                                                                                                           |                        |
| <b>History (&gt;3 days before T0) of Heart Failure</b>           | Diagnosed or suggested in EMR, or                                                                                                         | 0 = no<br>1 = yes      |
|                                                                  | Suggested by Echo findings (EF<54% or diastolic relaxation abnormalities of at least grade II)                                            |                        |
| <b>History (&gt;3 days before T0) of Coronary Artery Disease</b> | Diagnosed (as CAD or ischemic Cardiomyopathy) in EMR, or                                                                                  | 0 = no<br>1 = yes      |
|                                                                  | Suggested by heart catheterization report, or                                                                                             |                        |
|                                                                  | Previous ischemic event like myocardial infarction, known Angina, etc                                                                     |                        |
| <b>History (&gt;3days before T0) of Valvular Disease</b>         | At least moderate stenosis or regurgitation of any valve (mitral, aortic, tricuspid or pulmonary)<br><b>Not:</b> if successfully repaired | 0 = no<br>1 = yes      |
| <b>ST Changes</b>                                                | New ST Segment deviation of >/ 1mm in two consecutive leads, or                                                                           | 0 = no / NA<br>1 = yes |

*Online supplements are not copyedited prior to posting.*

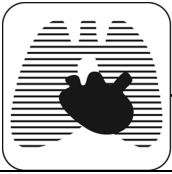

|                                                     |                                                                                                                                                                                                                                                                                                                                                                       |                   |
|-----------------------------------------------------|-----------------------------------------------------------------------------------------------------------------------------------------------------------------------------------------------------------------------------------------------------------------------------------------------------------------------------------------------------------------------|-------------------|
| (within 12h before till 6h after T0)                | <u>New</u> Left Bundle Branch Block<br><b>Not:</b> “secondary ST changes” (e.g. RBBB) or “unspecific ST abnormalities”                                                                                                                                                                                                                                                |                   |
| <b>Risk Factors for Acute Lung Injury</b>           |                                                                                                                                                                                                                                                                                                                                                                       |                   |
| <b>Sepsis</b><br>(within 24 h before T0)            | I. Suspected or documented infection<br>+<br>II. Systemic Inflammatory Response Syndrome SIRS (=at least two out of the following four are prevalent)<br>a) Temperature >38° or <36° C<br>b) Heart rate (HR) > 90/min<br>c) >20 respirations/min or PaCO <sub>2</sub> <32mmHg<br>d) Leucocytes <4,000/mm <sup>3</sup> or >12,000/mm <sup>3</sup>                      | 0 = no<br>1 = yes |
| <b>Shock</b><br>(within the 12 h before till T0)    | I. Hypotension, defined by either a), b) or c)<br>a) Systolic blood Pressure (SBP) <90mmHg or decreased >40mmHg from baseline<br>b) Shock Index (HR/SBP) >1<br>c) Mean arterial blood pressure <65mmHg<br>+<br>II. Evidence of inadequate tissue perfusion:<br>altered mental status only explainable by hemodynamic status <u>and</u> urine output <0.5ml/Kg/min, or | 0 = no<br>1 = yes |
|                                                     | in absence of hypotension:<br>I. Shock suggested by history and physical exam<br>+<br>II. at least 1 marker of inadequate perfusion:<br>a) ScvO <sub>2</sub> or SvO <sub>2</sub> <70%<br>b) Lactate >4mmol/L (in absence of liver disease)<br>c) Base excess <-4<br>d) Blood pH <7.32, or                                                                             |                   |
|                                                     | Any Vasopressors used ( <b>not:</b> Dobutamine)                                                                                                                                                                                                                                                                                                                       |                   |
| <b>Pneumonia</b><br>(within the 5 days prior to T0) | I. New or progressive radiographic infiltrate<br>+<br>II. High clinical suspicion of pneumonia: a) or b)<br>a) New cough, sputum, fever or WBC>12,000/mm <sup>3</sup><br>b) Suggested or diagnosed in EMR (not only DD, should be at least treated), or                                                                                                               | 0 = no<br>1 = yes |
|                                                     | I. NEW Abnormal chest radiograph of uncertain cause<br>+<br>II, Microbiological or serological evidence of definite or probable pneumonia (result available till 6h after SnifferTime!)                                                                                                                                                                               |                   |

*Online supplements are not copyedited prior to posting.*

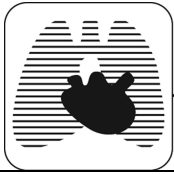

|                                                                 |                                                                                                                                                                                                                                                                                                                                         |                   |
|-----------------------------------------------------------------|-----------------------------------------------------------------------------------------------------------------------------------------------------------------------------------------------------------------------------------------------------------------------------------------------------------------------------------------|-------------------|
|                                                                 | III. Low or moderate clinical suspicion of pneumonia                                                                                                                                                                                                                                                                                    |                   |
| <b>Aspiration</b><br>(within 48 hours before T0)                | Witnessed or suggestive history of aspiration                                                                                                                                                                                                                                                                                           | 0 = no<br>1 = yes |
| <b>Pancreatitis</b><br>(within 24 hours before T0)              | Two or more out of the following three:<br>a) Abdominal pain characteristic of acute pancreatitis<br>b) Serum amylase and/or lipase >/ 3 times the upper limit of normal<br>c) Characteristic findings of acute pancreatitis on CT                                                                                                      | 0 = no<br>1 = yes |
| <b>Severe Trauma</b><br>(within 24 hours before T0)             | Any of the below:<br>a) Lung contusion - blunt, penetrating trauma to thorax that results in new infiltrates in x-ray<br>b) Polytrauma with at least 2 fractures (#) of long bones (tibia plus fibula # count as 1 long bone #)<br>Traumatic brain injury - closed or open head injury with one more associated condition like fracture | 0 = no<br>1 = yes |
| <b>High Risk Surgery</b><br>(within the 5 days before T0)       | Any of the below:<br>a) All cardiac and aortic vascular procedures<br>b) Noncardiac thoracic surgery including esophageal and pulmonary<br>c) Acute abdomen<br>d) Orthopedic spine surgeries<br>Liver transplant                                                                                                                        | 0 = no<br>1 = yes |
| <b>Smoke inhalation</b><br>(within 3 days before T0)            | reported in EMR                                                                                                                                                                                                                                                                                                                         | 0 = no<br>1 = yes |
| <b>Near drowning</b><br>(within 3 days before T0)               | reported in EMR                                                                                                                                                                                                                                                                                                                         | 0 = no<br>1 = yes |
| <b>Laboratory and Vital Sign Measurements</b>                   |                                                                                                                                                                                                                                                                                                                                         |                   |
| <b>Body Temperature</b><br>(within 12h before till 6h after T0) | Highest value in EMR                                                                                                                                                                                                                                                                                                                    | value             |
| <b>Troponin T</b><br>(within 12h before till 6h after T0)       | Highest value in EMR                                                                                                                                                                                                                                                                                                                    | value             |

*Online supplements are not copyedited prior to posting.*

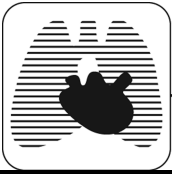

|                                                                          |                                                                                                                                                                                                            |                   |
|--------------------------------------------------------------------------|------------------------------------------------------------------------------------------------------------------------------------------------------------------------------------------------------------|-------------------|
| <b>Brain Natriuretic Peptide</b><br>(within 12h before till 6h after T0) | Highest value in EMR                                                                                                                                                                                       | value             |
| <b>Bicarbonate</b><br>(within 12h before till 6h after T0)               | Lowest Value in EMR                                                                                                                                                                                        | value             |
| <b>Lactate</b><br>(within 12h before till 6h after T0)                   | Highest value in EMR                                                                                                                                                                                       | value             |
| <b>Leucocytes</b><br>(within 12h before till 6h after T0)                | Highest value in EMR                                                                                                                                                                                       | value             |
| <b>Creatinine</b><br>(within 12h before till 6h after T0)                | Highest value in EMR                                                                                                                                                                                       | value             |
| <b>FiO2 at 6 (/5h)</b>                                                   | Closest value before 6h after T0                                                                                                                                                                           | value             |
| <b>SpO2 at 6h (/5h)</b>                                                  | The value within 30 minutes before till 30 minutes after 6h after T0 ( [T0+6h-30min;T0+6h+30min[ ) closest to this exact time<br>If NA, use T0 plus 5h as alternative time point (change FiO2 accordingly) | value             |
| <b>Risk Modifiers</b>                                                    |                                                                                                                                                                                                            |                   |
| <b>Chemotherapy</b>                                                      | Currently taken or within the six months before T0 as of documentation in EMR                                                                                                                              | 0 = no<br>1 = yes |
| <b>Alcohol Abuse</b>                                                     | >2drinks per day (any alcoholic beverage), or<br>if previous alcoholic, sober for <1 year                                                                                                                  | 0 = no<br>1 = yes |
| <b>Smoking</b>                                                           | Actively, or<br>>20 pack years                                                                                                                                                                             | 0 = no<br>1 = yes |
| <b>Diabetes mellitus</b>                                                 | Diabetes Type I or II according to EMR                                                                                                                                                                     | 0 = no<br>1 = yes |
| <b>Interstitial Lung Disease</b>                                         | Diagnosed or suggested in EMR                                                                                                                                                                              | 0 = no<br>1 = yes |
| <b>Transfusions</b>                                                      |                                                                                                                                                                                                            |                   |

*Online supplements are not copyedited prior to posting.*

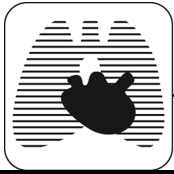

|                                                             |                  |                 |
|-------------------------------------------------------------|------------------|-----------------|
| <b>Platelets</b><br>(within 48h<br>before T0)               | According to EMR | Number of units |
| <b>Red Blood Cells</b><br>(within 48h<br>before T0)         | According to EMR | Number of units |
| <b>Fresh Frozen<br/>Plasma</b><br>(within 48h<br>before T0) | According to EMR | Number of units |

Abbreviations: T0 = time of the “Sniffer Alert”, EMR = Electronic Medical Record,

Under the assumption that the results were similar before onset of acute respiratory failure, laboratory Tests and EKGs were considered till 6hours after “T0” to minimize missing data. “Smoke Inhalation” and “Near Drowning” were assessed, but were not prevalent in the cohort and thus not further considered in the analysis. High risk surgery and severe trauma were originally collected as ALI risk factors for model inclusion, but were later used as exclusion criteria (details see manuscript). General information, laboratory results, vital sign measurements and transfusion data was electronically pulled from our intensive care database *datamart* [Herasevich V. et al. (2010). "Informatics infrastructure for syndrome surveillance, decision support, reporting, and modeling of critical illness." *Mayo Clin Proc* 85(3): 247-254.] the remainder was obtained by manual chart review.

### e-Appendix 2. Details on post-hoc expert review (gold standard)

#### A. Development Cohort (DC)

All Olmsted County residents admitted to any ICU in 2006 were reviewed at or after hospital discharge by one of two critical care specialists (one attending physician and one senior critical care fellow) blinded to the results of the decision support tool. Patients were classified as *acute lung injury (ALI)*, *cardiogenic pulmonary edema (CPE)*, *Both* (i.e. ALI+CPE) or as *Other*. All patients that were screened positive by the ALI-Sniffer as well as (very few) sniffer-negative patients who were marked as *ALI*, *CPE* or *Both* by the one expert were reviewed (blinded to each other) by both experts. Cases of disagreement were resolved by consensus. Thus, 1707 patients were reviewed yielding excellent agreement (kappa 0.86). Agreement between experts was similar in cases with (33%) vs cases without (67%) echocardiographic reports available (kappa 0.86 vs 0.85).

Patients enrolled in the years 2007-2009 were reviewed by experienced research fellows who underwent same structured training for the assessment of ALI/CPE as all expert reviewers. Critical care attending physicians re-reviewed all cases, in which the primary reviewers had doubts regarding final diagnosis or selected *Both* (ALI+CPE). Given the good kappa value in the 2006 subset duplicate evaluation in the remaining part of the development cohort (as well as in the VC) was omitted.

Rather than just looking for a “PAOP >18 mmHg or clinical evidence of left atrial hypertension” (Bernard et al. *Am J Respir Crit Care Med.* 1994) the post-hoc review followed a more formal determination of the role of left atrial hypertension (LAH) according to a previously published algorithm (Gajic et al. *Crit Care Med.* 2006): LAH was excluded by echocardiographic findings (E/E’ <15), brain natriuretic peptide levels (BNP <250 pg/ml in the

*Online supplements are not copyedited prior to posting.*



absence of renal failure) and venous filling pressures (PAOP <18 mmHg or CVP <12 mmHg in the absence of pulmonary hypertension). A brisk response (i.e. resolution of respiratory failure within 24 hours of onset) to appropriate therapy (preload/afterload reduction, treatment of ischemia or inotropic agents) was used as an indicator of hydrostatic edema (CPE).

### B. Validation cohort (VC)

Expert reviewers consisted of a mix of 4 critical care fellows and 2 attending physicians who followed the same formal approach in evaluating patients as in the development cohort.

### References:

Bernard GR, Artigas A, Brigham KL, et al. The American-European Consensus Conference on ARDS. Definitions, mechanisms, relevant outcomes, and clinical trial coordination. *Am J Respir Crit Care Med.* 1994;149:818-824.

Gajic O, Gropper MA, Hubmayr RD. Pulmonary edema after transfusion: how to differentiate transfusion-associated circulatory overload from transfusion-related acute lung injury. *Crit Care Med.* 2006;34:S109-113.

### e-Appendix 3.

#### Calculator for predicted probability of Acute Lung Injury (ALI) vs Cardiogenic Pulmonary Edema (CPE)

| DEMOGRAPHIC                                                      |                          |
|------------------------------------------------------------------|--------------------------|
| Age <45 years                                                    | <input type="checkbox"/> |
| CPE RISK FACTORS                                                 |                          |
| History of Heart Failure                                         | <input type="checkbox"/> |
| History of CAD                                                   | <input type="checkbox"/> |
| New ST changes/ LBBB                                             | <input type="checkbox"/> |
| ALI RISK FACTORS                                                 |                          |
| Sepsis or Pancreatitis                                           | <input type="checkbox"/> |
| Pneumonia                                                        | <input type="checkbox"/> |
| Aspiration                                                       | <input type="checkbox"/> |
| ALI RISK MODIFIER<br>(*yes* only if any of above ALI RF present) |                          |
| Alcohol Abuse*                                                   | <input type="checkbox"/> |
| MISCELLANEOUS                                                    |                          |
| Chemotherapy*                                                    | <input type="checkbox"/> |
| Persistent Hypoxemia:<br>SpO2/FiO2-ratio at 6h* <235             | <input type="checkbox"/> |
| <b>Score sum</b>                                                 | <b>####</b>              |
| Predicted Probability (%) for:                                   |                          |
| ALI                                                              | ####                     |
| CPE                                                              | ####                     |

#### Instructions:

Enter in each blank field "Yes" or "No". Once all fields are filled the probability for ALI vs CPE (and vice versa) will be displayed.

#### Legend:

Abbreviations: CAD=Coronary Artery Disease, LBBB=Left Bundle Branch Block; \*Definitions: SpO2/FiO2-ratio at 6 hours after onset of acute pulmonary edema, Alcohol Abuse is more than 2 drinks per day or known alcoholic sober for less than 1 year, Chemotherapy for malignancy within past 6 months;

#### Disclaimer:

This prediction score is for research use and MUST NOT be used in patient care. It has been developed in a population-based cohort and may not be applicable to other settings. There has been NO external validation. This calculator is part of the paper by Schmickl et al. "Prediction of ALI vs CPE" and should only be appreciated in this context.

Available under [www.lipsgroup.org/allcpe/](http://www.lipsgroup.org/allcpe/)

*Online supplements are not copyedited prior to posting.*



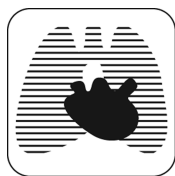**e-Table 1. Candidate variables for model development and their potential contribution to the prediction of ALI/ALI+CPE versus CPE (univariate analysis)**

| Predictor (N=332, otherwise shown)                                        | n (%)    | OR (95%-CI)<br>for ALI |
|---------------------------------------------------------------------------|----------|------------------------|
| <b>General Information</b>                                                |          |                        |
| Age, <45 years                                                            | 20 (6)   | 11.4 (3.2 to 72.1)*    |
| Female Sex                                                                | 174 (52) | 0.69 (0.44 to 1.06)    |
| <b>Risk Factors for Acute Lung Injury</b>                                 |          |                        |
| Sepsis or Pancreatitis <sup>†</sup>                                       | 108 (33) | 6.4 (3.8 to 10.9)*     |
| Shock                                                                     | 89 (27)  | 2.13 (1.30 to 3.52)*   |
| Pneumonia                                                                 | 109 (33) | 2.54 (1.60 to 4.1)*    |
| Aspiration                                                                | 34 (10)  | 2.24 (1.09 to 4.84)*   |
| Platelet Transfusion                                                      | 8 (2)    | 3.5 (0.79 to 24.0)     |
| <b>Risk Factors for Cardiogenic Pulmonary Edema</b>                       |          |                        |
| Hx of Heart Failure                                                       | 103 (31) | 0.38 (0.23 to 0.62)*   |
| Hx of Coronary Artery Disease                                             | 136 (41) | 0.40 (0.25 to 0.63)*   |
| ST Changes/ LBBB, N=235                                                   | 52 (22)  | 0.39 (0.19 to 0.75)*   |
| Hx of Valvular Disease                                                    | 50 (15)  | 0.72 (0.38 to 1.31)    |
| <b>Laboratory Results and Vital Sign Measurements</b>                     |          |                        |
| SpO <sub>2</sub> /FiO <sub>2</sub> -ratio at 6h <235 <sup>‡</sup> , N=324 | 186 (57) | 2.62 (1.67 to 4.16)*   |
| Brain Natriuretic Peptide, <250pg/ml, N=74                                | 18 (24)  | 1.81 (0.62 to 5.58)    |
| Bicarbonate, <22mmol/L, N=317                                             | 114 (36) | 1.70 (1.07 to 2.71)*   |
| Creatinine, >1.1mg/dl, N=312                                              | 154 (49) | 0.81 (0.52 to 1.27)    |
| Lactate, >2.3mmol/L, N=142                                                | 51 (36)  | 1.09 (0.55 to 2.18)    |
| Leucocytes, <4 or >12/nl, N=311                                           | 176 (57) | 1.34 (0.85 to 2.10)    |
| Temperature, <36 or >38° Celsius, N=268                                   | 79 (30)  | 1.74 (1.03 to 2.98)*   |
| Troponin T, >0.03ng/ml, N=213                                             | 113 (53) | 0.59 (0.34 to 1.02)    |
| <b>Risk Modifiers and Miscellaneous</b>                                   |          |                        |
| (Alcohol Abuse x ALI RF <sup>§</sup> )                                    | 20 (6)   | 11.4 (3.2 to 72.1)*    |
| Chemotherapy                                                              | 18 (5)   | 9.9 (2.8 to 63.5)*     |
| Smoking, current or >20 pack years                                        | 149 (45) | 1.10 (0.72 to 1.70)    |
| Diabetes mellitus                                                         | 91 (27)  | 0.66 (0.40 to 1.07)    |

Abbreviations: OR=Odds Ratio, 95%-CI=95%-Confidence Interval, Hx=History, LBBB=left bundle branch block;

\* statistically significant;

<sup>†</sup> Variables were combined since pancreatitis had a small event rate and pathophysiological mechanism causing acute lung injury is similar to that of sepsis;

<sup>‡</sup> SpO<sub>2</sub>/FiO<sub>2</sub>-ratio at 6 hours after onset of acute pulmonary edema;

<sup>§</sup> ALI RF=ALI risk factor (coded 1 if patient had any of the following: Sepsis, Pancreatitis, Pneumonia, Aspiration; else 0);

The chosen cut-off values for continuous variables reflect standard thresholds. Odds ratios were calculated using univariate logistic regression. Higher odds ratio indicates a higher risk of ALI/ALI+CPE vs CPE.

*Online supplements are not copyedited prior to posting.*

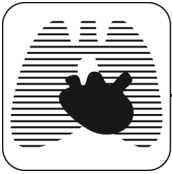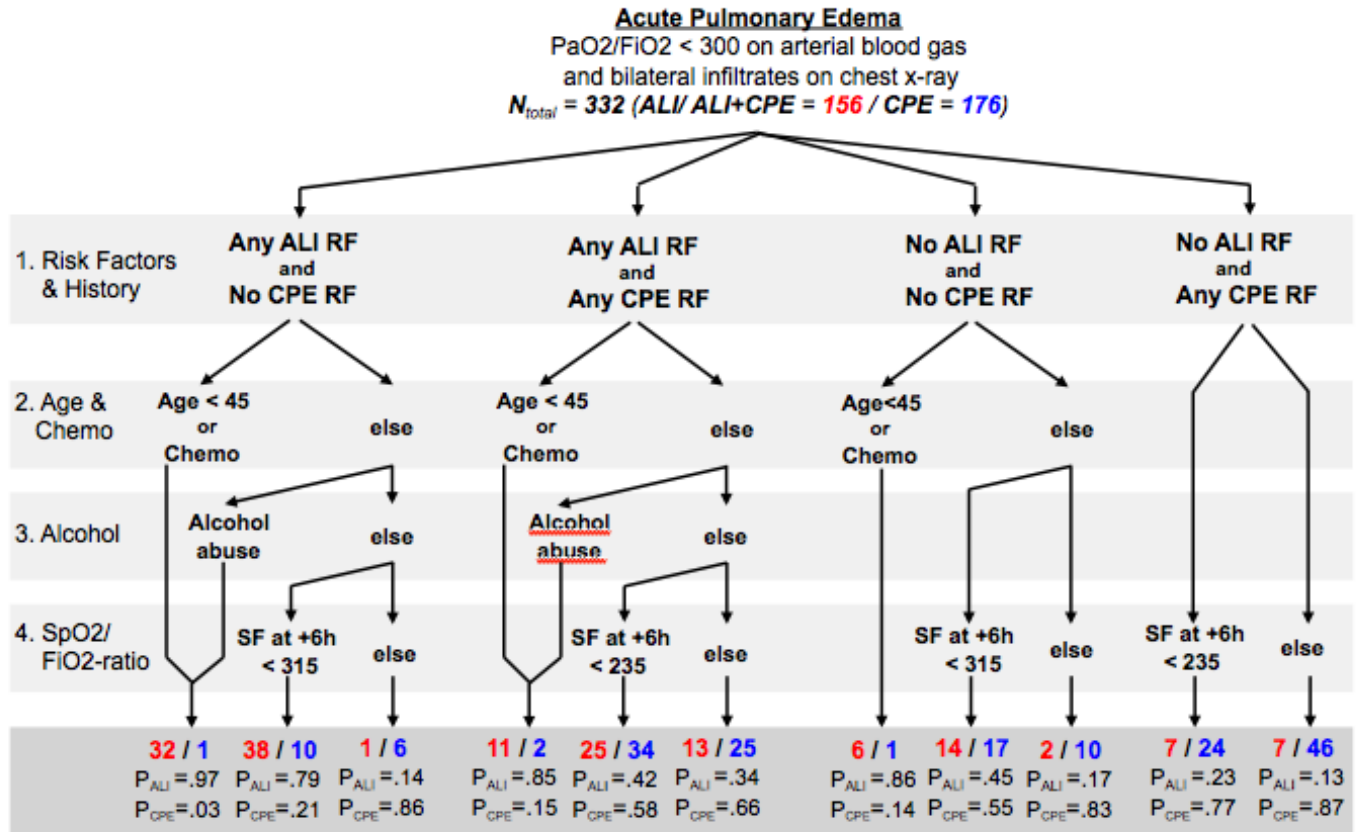

**Explanations:** RF=risk factor; ALI=acute lung injury, CPE=cardiogenic pulmonary edema, P<sub>ALI</sub> or P<sub>CPE</sub> are the probability for a patient with the characteristics of a certain branch to have ALI or CPE, respectively; **ALI RF:** Sepsis, Pancreatitis, Shock, Pneumonia, Aspiration; **CPE RF:** History of coronary artery disease, History of heart failure (clinical or by Echo) or New ST segment changes (>1mm in 2 consecutive leads) or left bundle branch block; **Alcohol abuse:** >2 alcoholic beverages per day; **Chemo:** Chemotherapy for malignancy in past 6 months; **SF at +6h:** SpO<sub>2</sub>/FIO<sub>2</sub>-ratio at 6 hours after the onset of acute pulmonary edema;

**e-Figure 1. Recursive partitioning model**

*Online supplements are not copyedited prior to posting.*



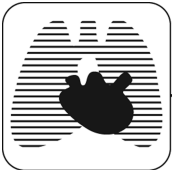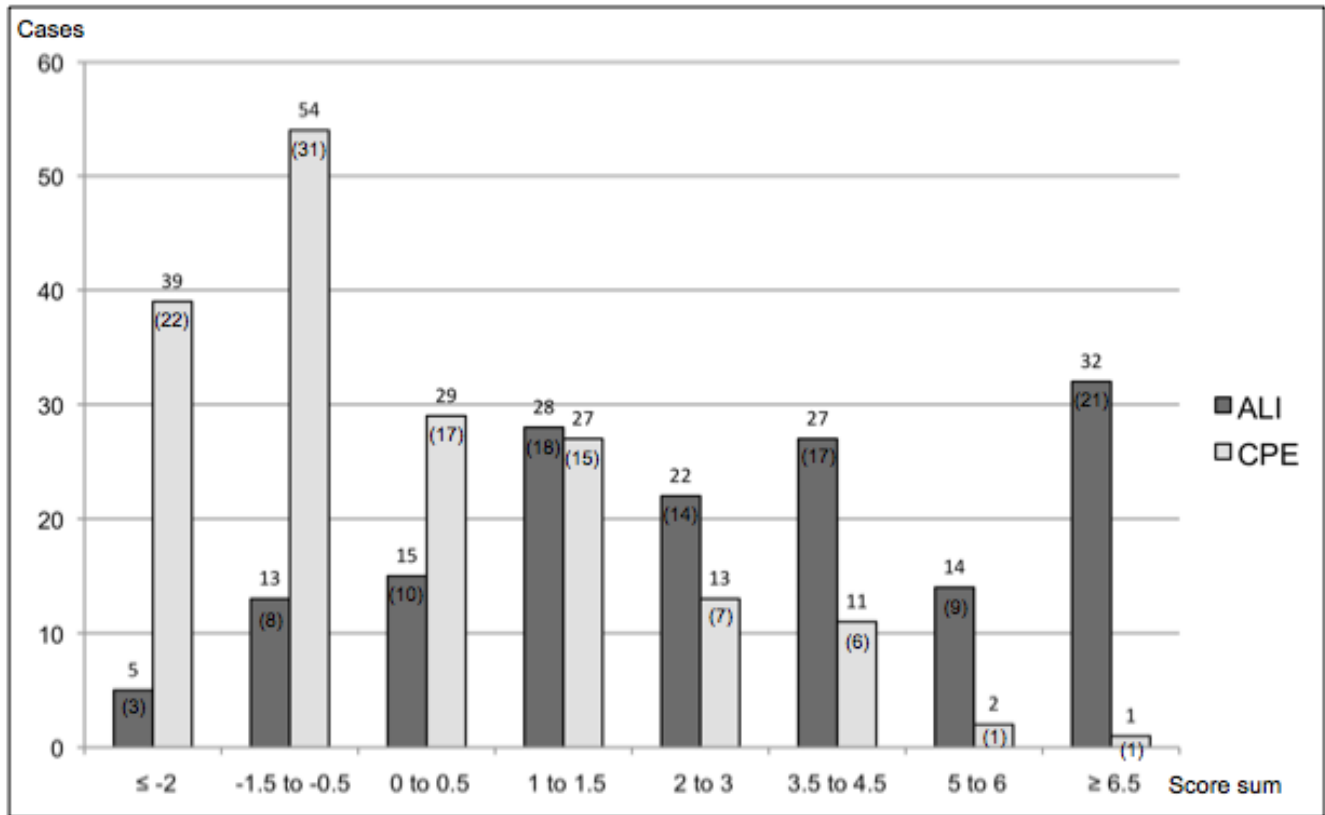

**e-Figure 2. Distribution of score sums among ALI/ALI+CPE and CPE patients, respectively.** Above each column is the absolute number of cases shown, the number in parentheses denotes the percentage of cases with respect to each group. 61% (95/156) of ALI patients had a score sum of equal or greater than 2. Conversely, 69% (122/176) of CPE patients had a score sum of equal or less than 0.5.

*Online supplements are not copyedited prior to posting.*
